# Supplementary material for: Improved Spectral Angle Mapper applications for mangrove classification using SPOT5 imagery
Source: Copernicus journal article supplement (doi:10.5194/os-2019-13), 2019-07-12
Supplement: Supplementary file 1 [file os-2019-13-supplement.pdf]

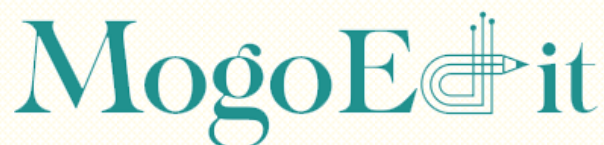

## CERTIFICATE OF ENGLISH EDITING

This is to certify that the manuscript entitled  
***Improved Spectral Angle Mapper applications for mangrove classification  
using SPOT5 imagery***

commissioned to us has been carefully edited by a native English-speaking editor of MogoEdit, and the grammar, spelling, and punctuation have been verified and corrected where needed. Based on this review, we believe that the language in this paper meets academic journal requirements. Please contact us with any questions.

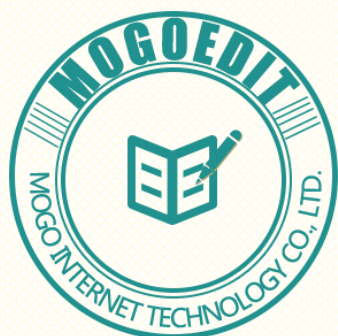

*Gang Zhang*

Dr. Gang Zhang  
Founder & CEO of MogoEdit

Date of Issue  
February 21, 2019

**Disclaimer:** The changes in the document may be accepted or rejected by the authors in their sole discretion after our editing. However, MogoEdit is not responsible for revisions made to the document after our edit on **February 21, 2019**.

MogoEdit is a professional English editing company who provides English language editing, translation, and publication support services to individuals and corporate customers worldwide. As a company invested by the affiliate fund of Chinese Academy of Science, MogoEdit is one of the leading language editing service providers in China, whose clients come from more than 1000 universities and research institutes.

MogoEdit Website: <http://en.mogoedit.com/>

500+ native English editors: <http://en.mogoedit.com/editors>

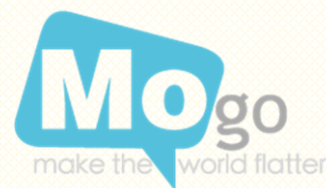

---

Mogo Internet Technology Co., LTD.

No. 25, 1st Gaoxin Road, Xi'an 710075, PR China +86 02988317483 [support@mogoedit.com](mailto:support@mogoedit.com)
